# Supplementary material for: Two mixed valence diruthenium(ii,iii) isomeric complexes show different anticancer properties
Source: Royal Society of Chemistry journal article supplement (doi:10.1039/d1dt01492g), 2021-01-01
Supplement: d1dt01492g1.pdf [file d1dt01492g1.pdf]

## Two mixed valence diruthenium (II,III) isomeric complexes show different anticancer properties

Elisabetta Barresi,<sup>a†</sup> Iogann Tolbatov,<sup>b†</sup> Tiziano Marzo,<sup>a,c\*</sup> Elisa Zappelli,<sup>a</sup> Alessandro Marrone,<sup>d</sup> Nazzareno Re,<sup>d\*</sup> Claudia Martini,<sup>a</sup> Alessandro Pratesi,<sup>e</sup> Sabrina Taliani,<sup>a\*</sup> Federico Da Settimo<sup>a</sup> and Diego La Mendola<sup>a</sup>

<sup>a</sup>Department of Pharmacy, University of Pisa. Via Bonanno Pisano, 6, 56126, Pisa, Italy. E-mail: [tiziano.marzo@unipi.it](mailto:tiziano.marzo@unipi.it); [sabrina.taliani@unipi.it](mailto:sabrina.taliani@unipi.it)

<sup>b</sup>Institut de Chimie Moleculaire de l'Université de Bourgogne (ICMUB), Université de Bourgogne Franche-Comté (UBFC), avenue Alain Savary 9, Dijon, France

<sup>c</sup>CISUP-Centro per l'Integrazione della Strumentazione Scientifica dell'Università di Pisa, University of Pisa, Italy

<sup>d</sup>Dipartimento di Farmacia, Università degli Studi "G. D'Annunzio" Chieti-Pescara, Via dei Vestini, I-66100 Chieti, Italy. E-mail: [nre@unich.it](mailto:nre@unich.it)

<sup>e</sup>Department of Chemistry and Industrial Chemistry, University of Pisa, Via G. Moruzzi, 13, 56124 Pisa, Italy

<sup>†</sup> Equal contribution.

|                                                                                                                                                    |   |
|----------------------------------------------------------------------------------------------------------------------------------------------------|---|
| Computational studies.....                                                                                                                         | 2 |
| Spectrum for solution behavior of [Ru <sub>2</sub> (EB776) <sub>4</sub> Cl].....                                                                   | 5 |
| ESI-MS experiments on [Ru <sub>2</sub> (EB106) <sub>4</sub> Cl] and [Ru <sub>2</sub> (EB776) <sub>4</sub> Cl] in presence of lysozyme and HSA..... | 6 |
| Cellular experiments.....                                                                                                                          | 9 |

Table S1. Boltzmann populations for the most representative conformations of  $[\text{Ru}_2(\text{EB106})_4\text{Cl}]$  and  $[\text{Ru}_2(\text{EB776})_4\text{Cl}]$ . Distances from closest points on hydrophilic surface to carboxylate oxygens.

| Complexes                                | Conformers | Population, % | Distances from closest points of hydrophilic regions to carboxylate oxygens |              |
|------------------------------------------|------------|---------------|-----------------------------------------------------------------------------|--------------|
|                                          |            |               | Within 2.5 Å                                                                | Within 3.0 Å |
| $[\text{Ru}_2(\text{EB106})_4\text{Cl}]$ | 1          | 86            | -                                                                           | 2.73         |
|                                          | 2          | 6             | -                                                                           | 2.75         |
|                                          | 3          | 6             | -                                                                           | 2.82, 2.99   |
| $[\text{Ru}_2(\text{EB776})_4\text{Cl}]$ | 1          | 24            | 2.03, 2.14, 2.41                                                            | 2.58         |
|                                          | 2          | 16            | 2.19                                                                        | 2.68, 2.76   |
|                                          | 3          | 16            | 2.48                                                                        | 2.53         |
|                                          | 4          | 11            | 2.47                                                                        | 2.69         |
|                                          | 5          | 9             | 2.44                                                                        | 2.61, 2.83   |
|                                          | 6          | 7             | 2.27                                                                        | 2.66, 2.80   |
|                                          | 7          | 5             | -                                                                           | 2.63, 2.91   |
|                                          | 8          | 5             | 2.39                                                                        | 2.8          |
|                                          | 9          | 3             | 2.14, 2.35                                                                  | 2.52, 2.96   |

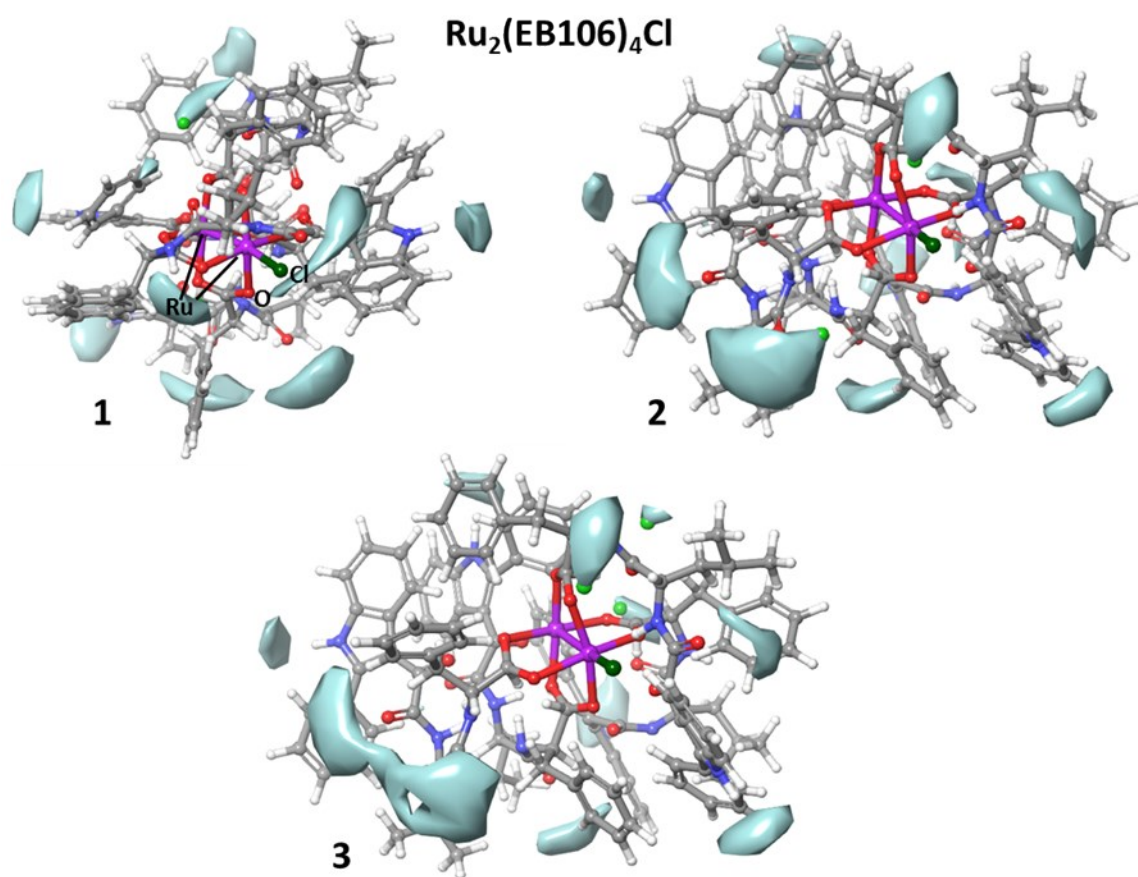

Fig. S1. Analyzed conformers of complex  $[\text{Ru}_2(\text{EB106})_4\text{Cl}]$  and their hydrophilic fragments.

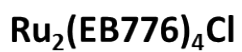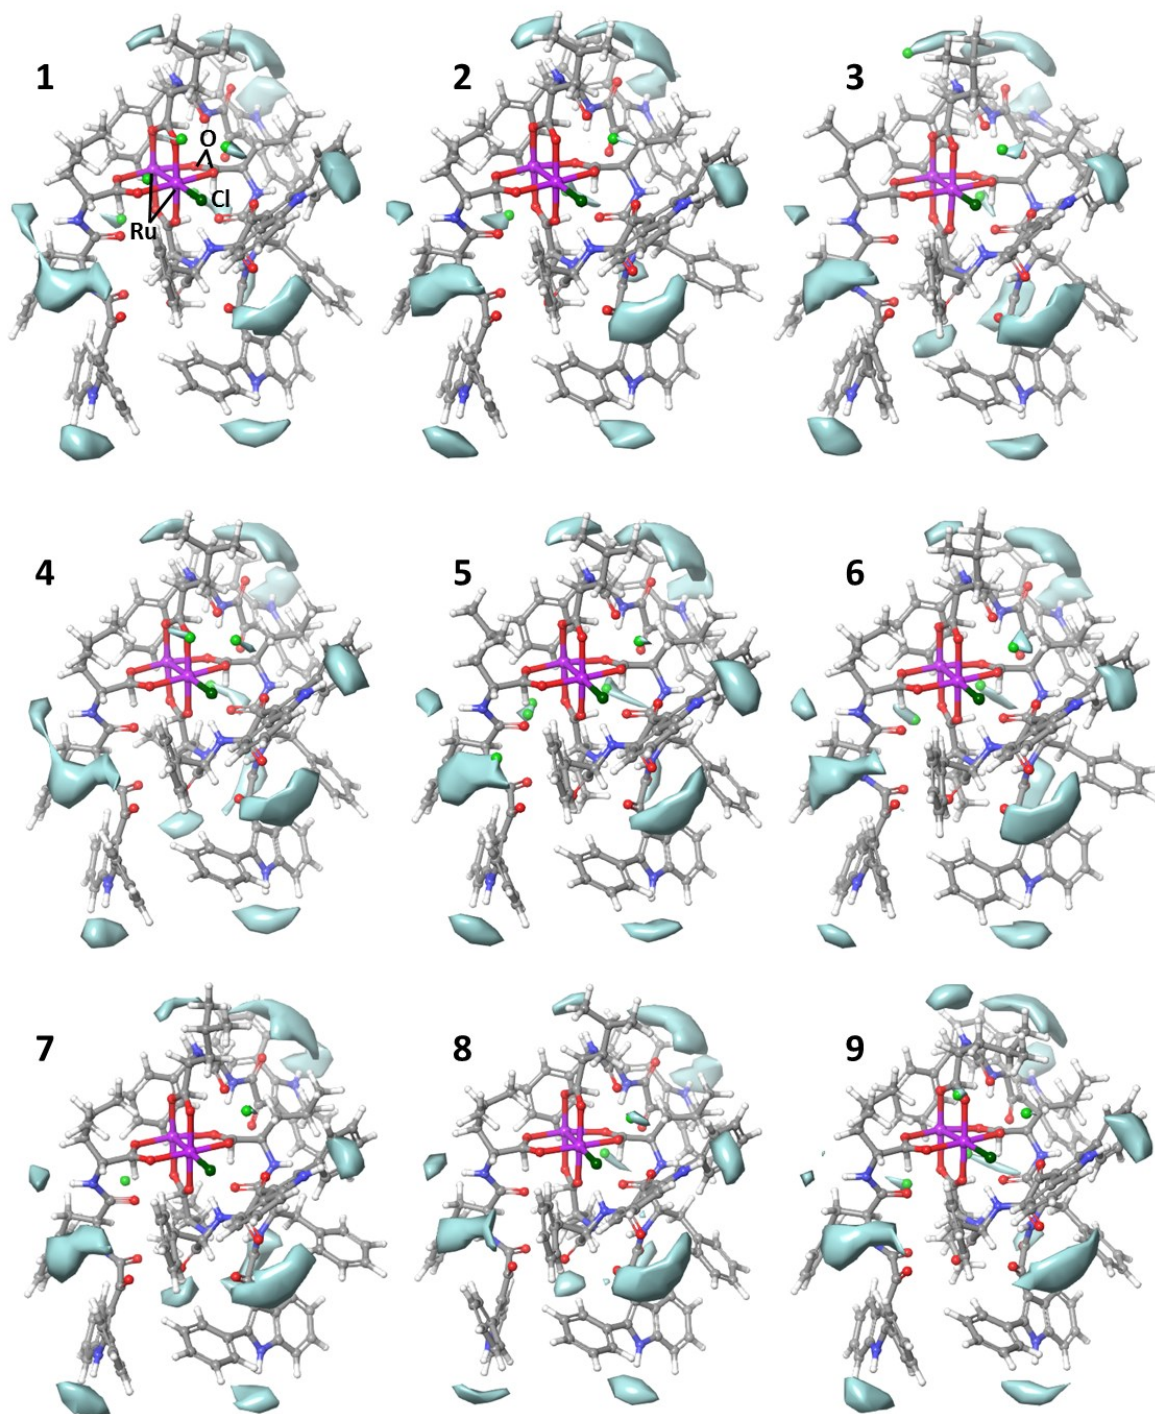

Fig. S2. Analyzed conformers of complex  $[\text{Ru}_2(\text{EB776})_4\text{Cl}]$  and their hydrophilic fragments.

### Solution behavior of $[\text{Ru}_2(\text{EB776})_4\text{Cl}]$

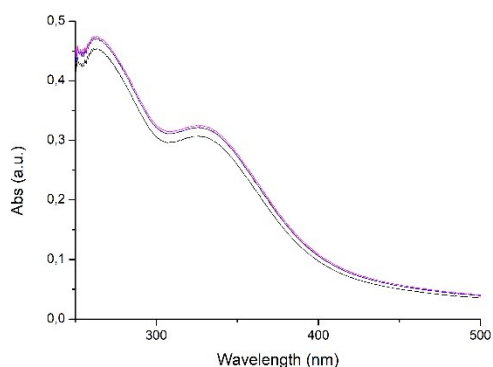

Fig. S3. Time dependent UV-Vis spectral profiles of  $[\text{Ru}_2(\text{EB776})_4\text{Cl}]$ ,  $10^{-5}$  M in 10 mM phosphate buffer in presence of 40 % DMSO (pH = 7.4) followed for 72 h.

### ESI-MS experiments on $[\text{Ru}_2(\text{EB106})_4\text{Cl}]$ and $[\text{Ru}_2(\text{EB776})_4\text{Cl}]$ in presence of lysozyme and HSA

ESI-MS interactions experiments were carried out at different protein to complex ratio (10:1 and 5:1) after 72 h incubation. Figures S4-S7 show the incubation with Human Serum Albumin (HSA) while figures S8-S11 incubation with lysozyme. 66 KDa=HSA; 14.3 KDa Lysozyme. No adducts formation was detected. Experiments were carried out following the protocol reported in ref. 20 of main manuscript (*Barresi et al., Dalton Trans., 49, 2020, 14520-14527*), i.e. using a TripleTOF<sup>®</sup> 5600+ mass spectrometer (Sciex, Framingham, MA, U.S.A.), equipped with a DuoSpray<sup>®</sup> interface operating with an ESI probe in positive polarity.

HSA\_ $[\text{Ru}_2(\text{EB106})_4\text{Cl}]$ \_10:1\_5x10<sup>-7</sup>M\_AmAc2mM\_72h\_

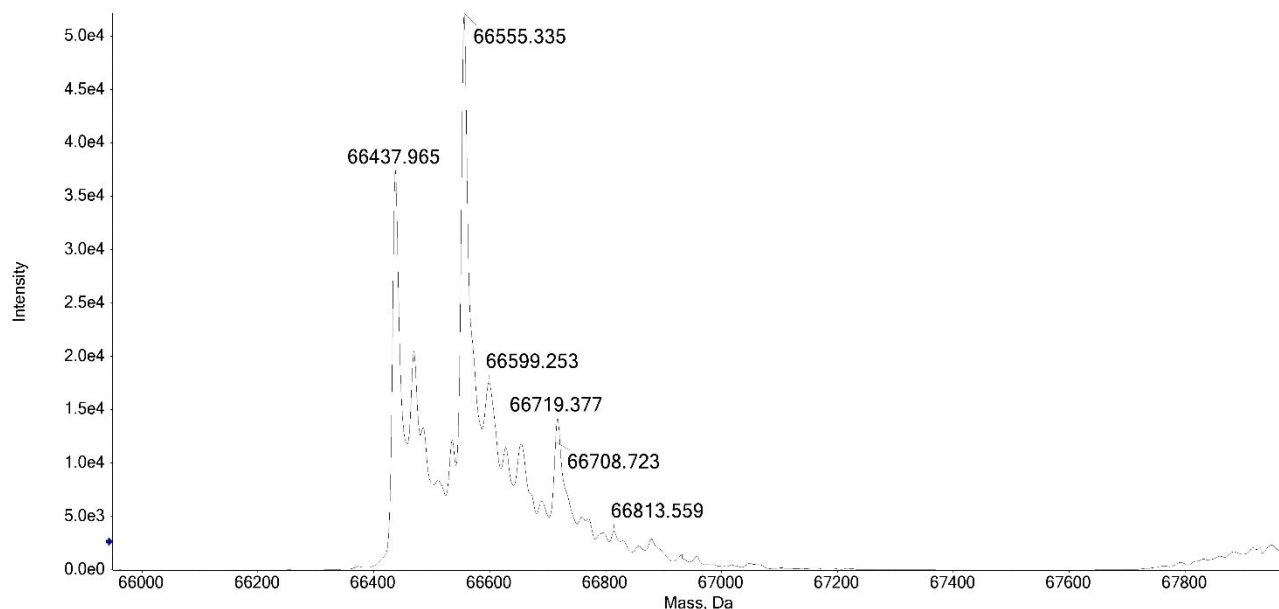

Fig. S4.

HSA\_[Ru<sub>2</sub>(EB106)<sub>4</sub>Cl]\_5:1\_5x10<sup>-7</sup>M\_AmAc2mM\_72h\_

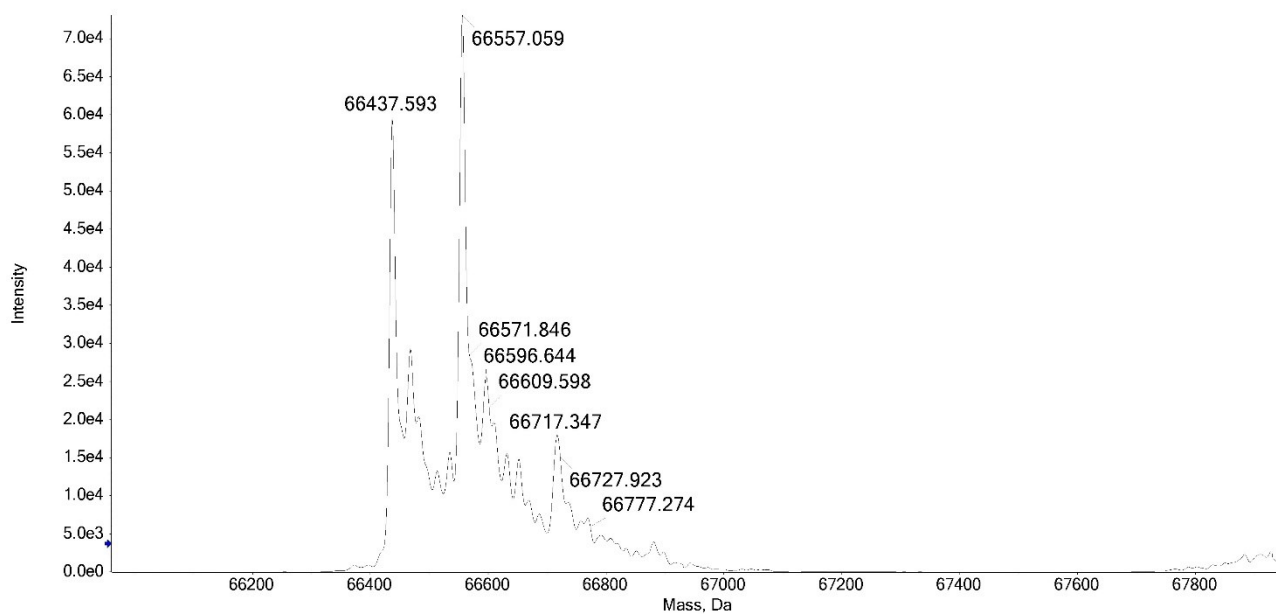

Fig. S5.

HSA\_[Ru<sub>2</sub>(EB776)<sub>4</sub>Cl]\_10:1\_5x10<sup>-7</sup>M\_AmAc2mM\_72h\_

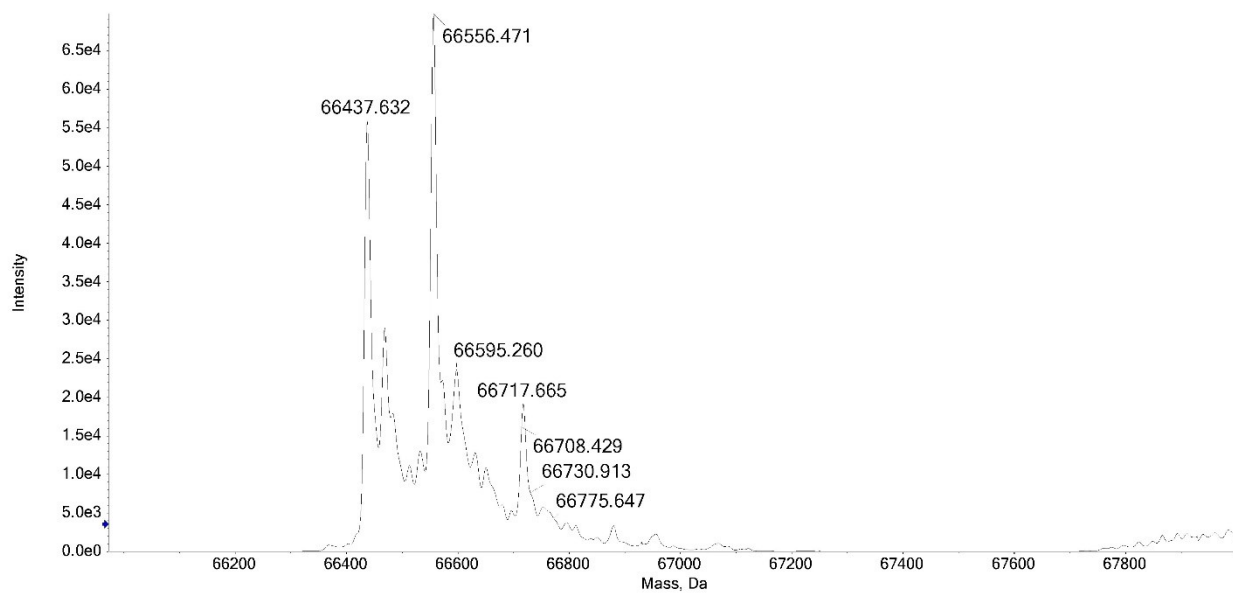

Fig. S6.

HSA\_[Ru<sub>2</sub>(EB776)<sub>4</sub>Cl]<sub>5</sub>:1\_5x10<sup>-7</sup>M\_AmAc2mM\_72h\_

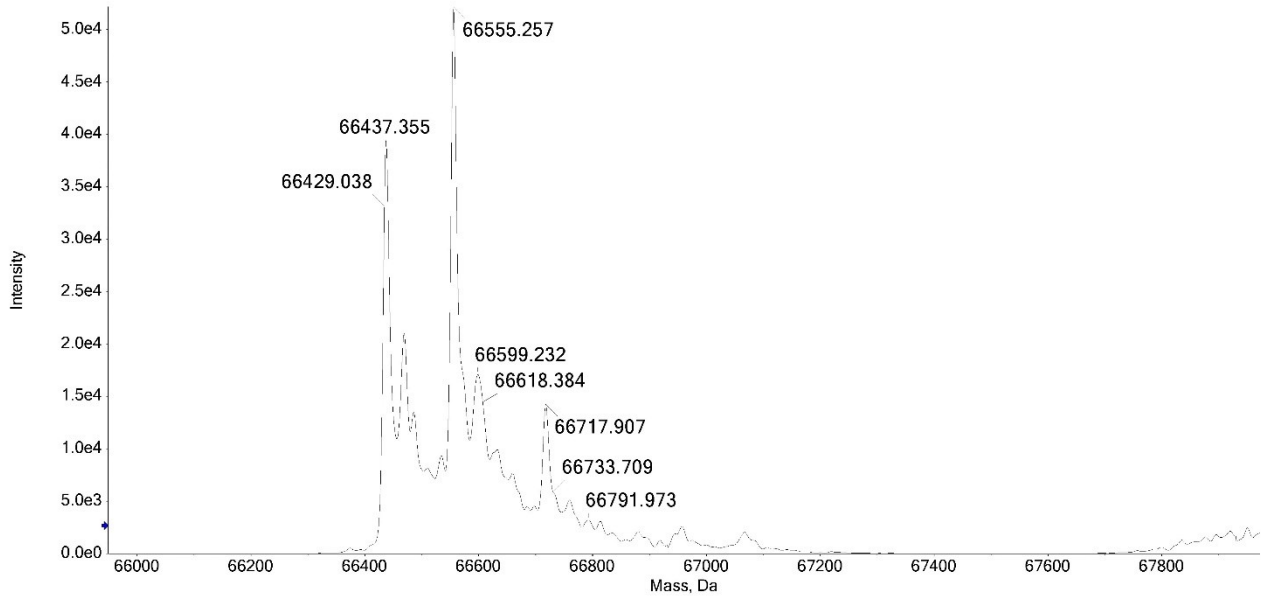

Fig. S7.

Lys\_[Ru<sub>2</sub>(EB106)<sub>4</sub>Cl]<sub>10</sub>:1\_10<sup>-7</sup>M\_AmAc2mM\_72h\_

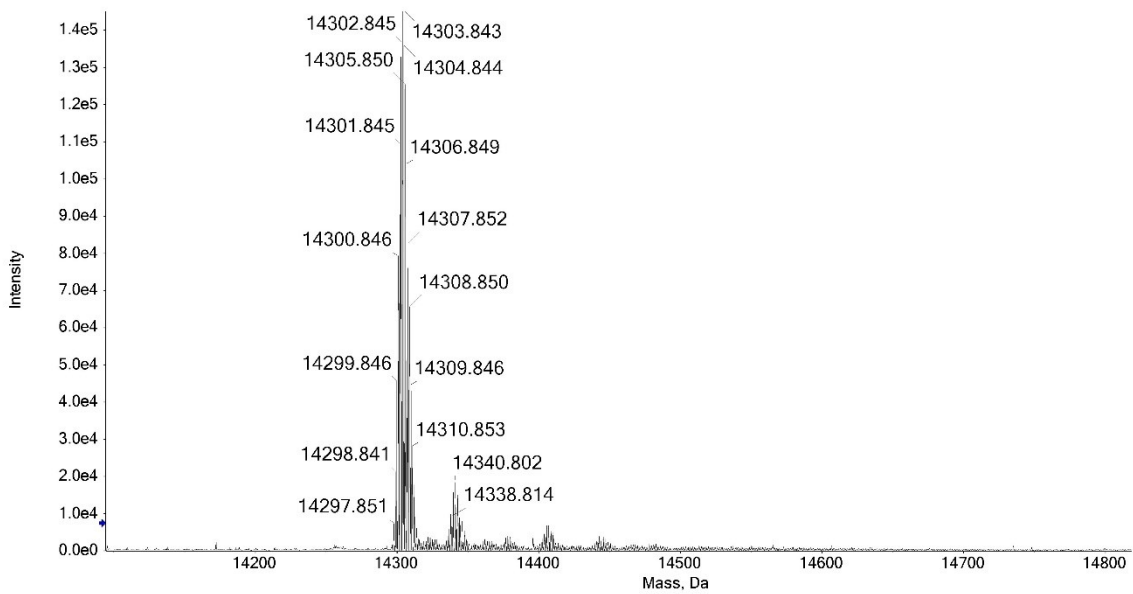

Fig. S8.

Lys\_ [Ru<sub>2</sub>(EB106)<sub>4</sub>Cl]\_5:1\_10-7M\_AmAc2mM\_72h\_

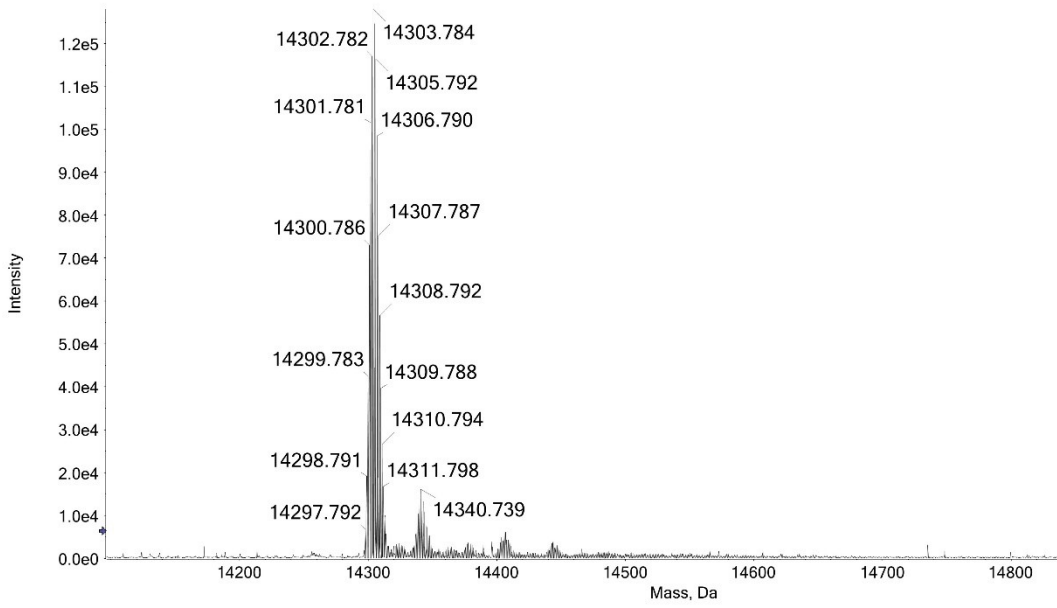

Fig. S9.

Lys\_ [Ru<sub>2</sub>(EB776)<sub>4</sub>Cl]\_10:1\_10-7M\_AmAc2mM\_72h\_

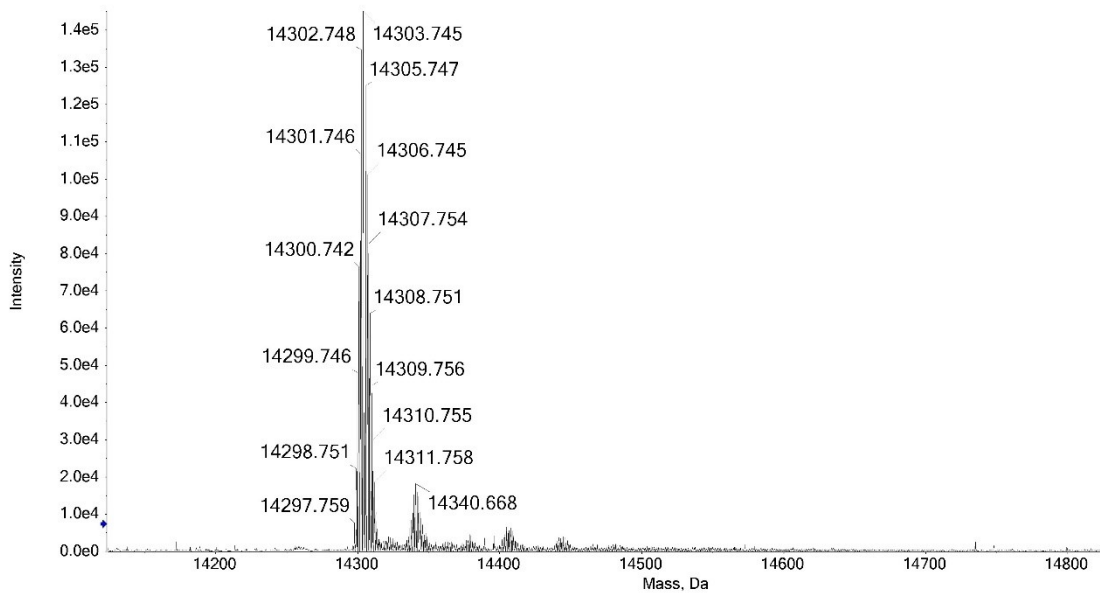

Fig. S10.



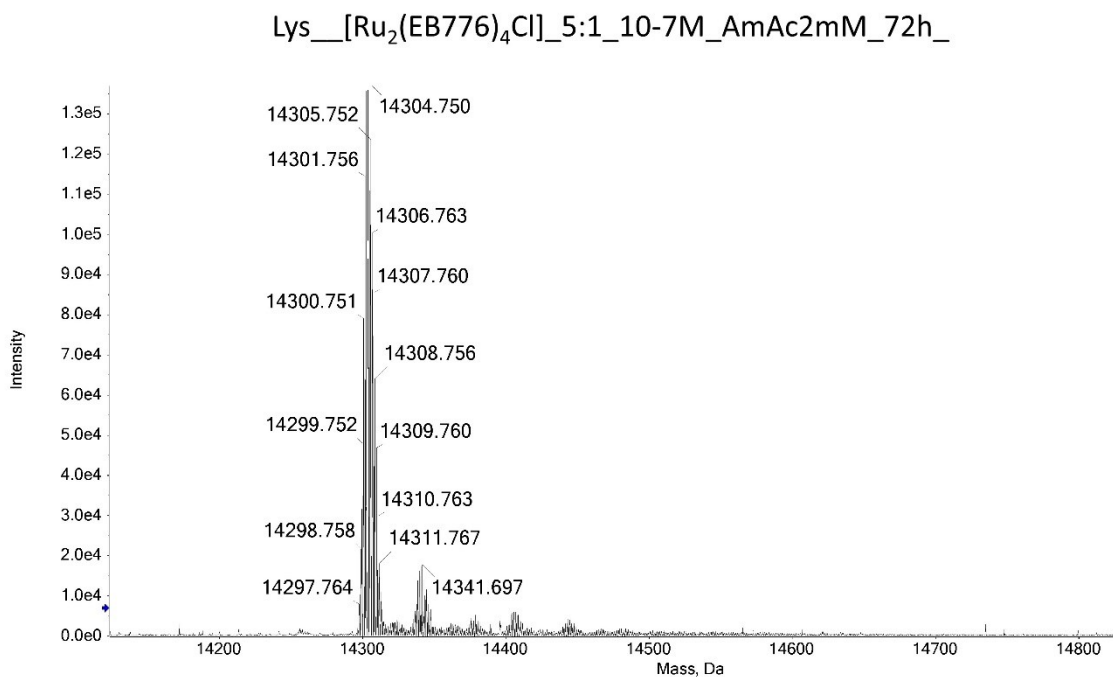

Fig. S11.

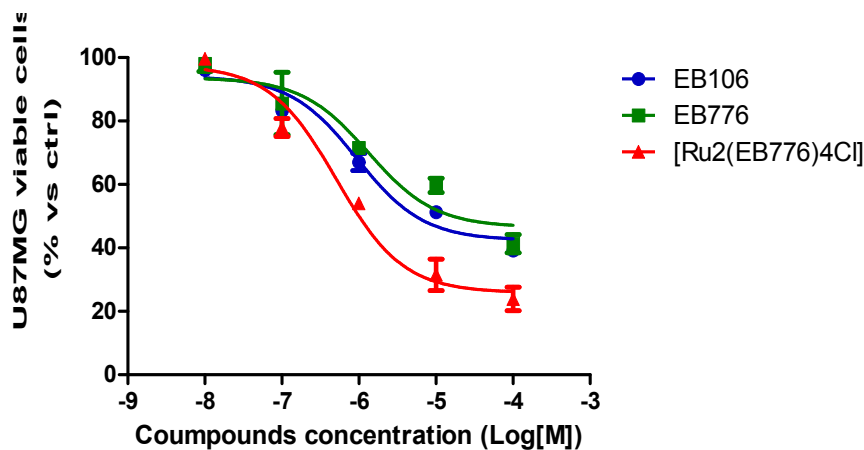

Fig. S12. Evaluation of in vitro anti-proliferative effect: U87MG cells were treated with increasing concentrations of the EB106, EB776 and [Ru<sub>2</sub>(EB776)<sub>4</sub>Cl] compounds; after 72 h of treatment cellular viability was measured by MTS assay. Data were expressed as percentage of compound-treated viable cells respect to control viable cells. Curves were generated using a sigmoidal dose-response curve model (GraphPad Prism 5 software) from which the IC<sub>50</sub> values were derived. Data represent the mean ± SEM of three different experiments. Each experiment was performed in triplicate.
